# Supplementary material
Source: PubMed Central journal article supplement (PMC7213964)
Supplement: mmc1.pdf [file mmc1.pdf]

# THE LANCET

## Haematology

### Supplementary appendix

This appendix formed part of the original submission and has been peer reviewed.  
We post it as supplied by the authors.

Supplement to: Levi M, Thachil J, Iba I, Levy JH. Coagulation abnormalities and thrombosis in patients with COVID-19. *Lancet Haematol* 2020; published online May 11. [https://doi.org/10.1016/S2352-3026\(20\)30145-9](https://doi.org/10.1016/S2352-3026(20)30145-9).

## Supplemental reference list

1. Taylor FB, Jr, Toh CH, Hoots WK, Wada H, Levi M. Towards definition, clinical and laboratory criteria, and a scoring system for disseminated intravascular coagulation. *Thromb Haemost* 2001;86:1327-30.
2. **Fox SE, Atmakbekov A, Harbert JL, Li G, Brown JQ, Vander Heide RS. Pulmonary and cardiac pathology in Covid-19: The first autopsy series from New Orleans. MedRxiv 2020; in press/available on-line.**
3. **Gralinski LE, Bankhead A, Jeng S, et al. Mechanisms of severe acute respiratory syndrome coronavirus-induced acute lung injury. mBio 2013:e00271-13.**
4. Liu ZH, Wei R, Wu YP, et al. Elevated plasma tissue-type plasminogen activator (t-PA) and soluble thrombomodulin in patients suffering from severe acute respiratory syndrome (SARS) as a possible index for prognosis and treatment strategy. *Biomedical and environmental sciences: BES* 2005;18:260-4.
5. Valade S, Mariotte E, Azoulay E. Coagulation Disorders in Hemophagocytic Lymphohistiocytosis/Macrophage Activation Syndrome. *Crit Care Clin* 2020;36:415-26.
6. Lodigiani C, Iapichino G, Carenzo L, et al. Venous and arterial thromboembolic complications in COVID-19 patients admitted to an academic hospital in Milan, Italy. *Thromb Res* 2020;191:9-14.
7. Llitjos JF, Leclerc M, Chochois C, et al. High incidence of venous thromboembolic events in anticoagulated severe COVID-19 patients. *J Thromb Haemost* 2020; in press/available on-line.
8. Boonyawat K, Crowther M. Venous thromboembolism prophylaxis in critically ill patients. *Sem Thromb Hemostas* 2015;41:68-74.
